# Supplementary material
Source: publisher figshare collection journal article supplement (https://acs.figshare.com/ndownloader/files/4137760)
Supplement: Supplementary file 1 [file 4137760]

# X-ray Absorption study of the solvation structure of $\text{Cu}^{2+}$ in methanol and dimethyl sulfoxide

Andrea Zitolo<sup>\*,‡</sup>, Giovanni Chillemi<sup>#</sup>, Paola D'Angelo<sup>\*,‡</sup>

<sup>‡</sup> Dipartimento di Chimica, Università di Roma “La Sapienza”,  
P.le A. Moro 5, 00185 Roma, Italy

<sup>#</sup> CASPUR, Inter-University Consortium for Supercomputing  
in Research, via dei Tizii 6b, 00185 Roma, Italy

<sup>\*</sup> p.dangelo@caspur.it, zitolo@caspur.it

## Supporting information

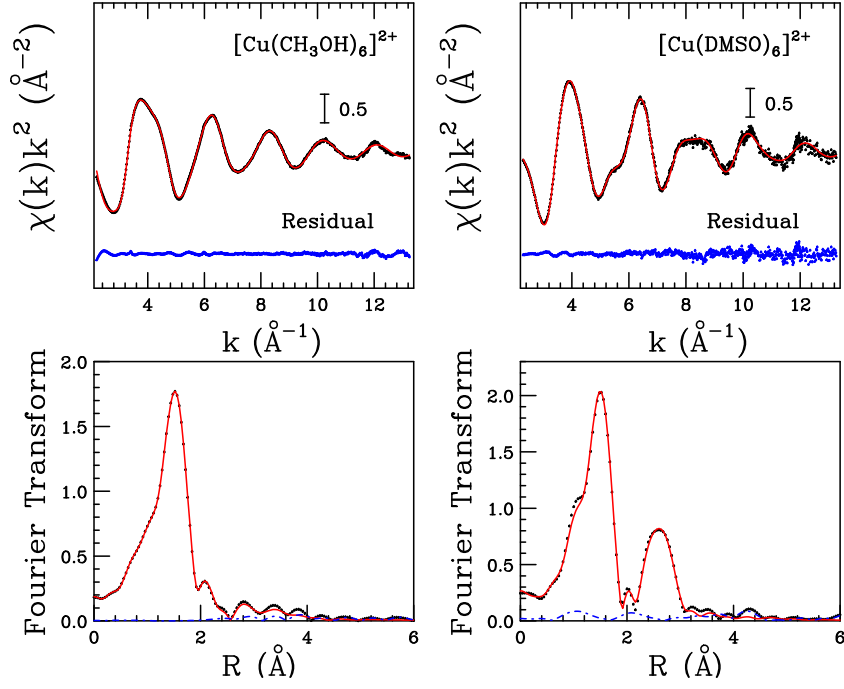

Figure S1. Comparison of the experimental Cu K-edge EXAFS spectra of  $\text{Cu}^{2+}$  in MeOH and DMSO solutions (red, solid line) and the theoretical signals calculated for a sixfold JT distorted octahedral geometry (black, dotted line). In the lower panels, the comparison of the modulus of the Fourier transform of the experimental  $k^2$  EXAFS spectra (red, solid line) and the fitting results (black, dotted line) is shown.

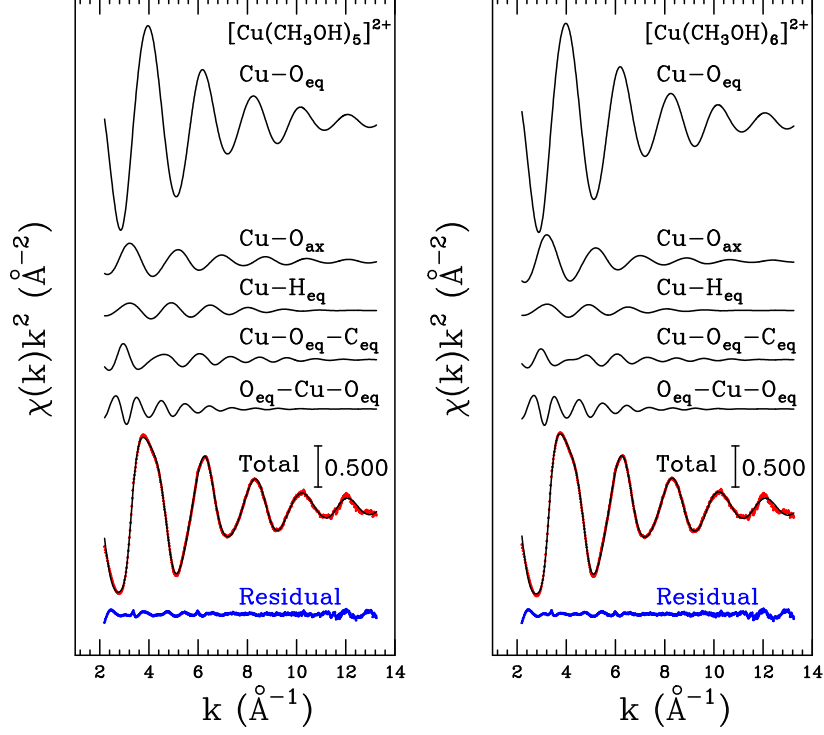

Figure S2. Comparison between the experimental and theoretical Cu K-edge EXAFS spectra of  $\text{Cu}^{2+}$  in MeOH calculated for a fivefold (left panel) and sixfold JT distorted octahedral (right panel) geometry. From the top to the bottom of each panel the following curves are reported:  $\text{Cu}-\text{O}_{\text{eq}}$ ,  $\text{Cu}-\text{O}_{\text{ax}}$ ,  $\text{Cu}-\text{S}_{\text{eq}}$ ,  $\text{Cu}-\text{S}_{\text{ax}}$  and  $\text{Cu}-\text{C}_{\text{eq}}$  two-body signals,  $\text{Cu}-\text{O}_{\text{eq}}-\text{S}_{\text{eq}}$  and  $\text{O}_{\text{eq}}-\text{Cu}-\text{O}_{\text{eq}}$  three-body signals, total theoretical contribution (black line) compared to the experimental spectrum (red dotted line) and resulting residual (blue line)

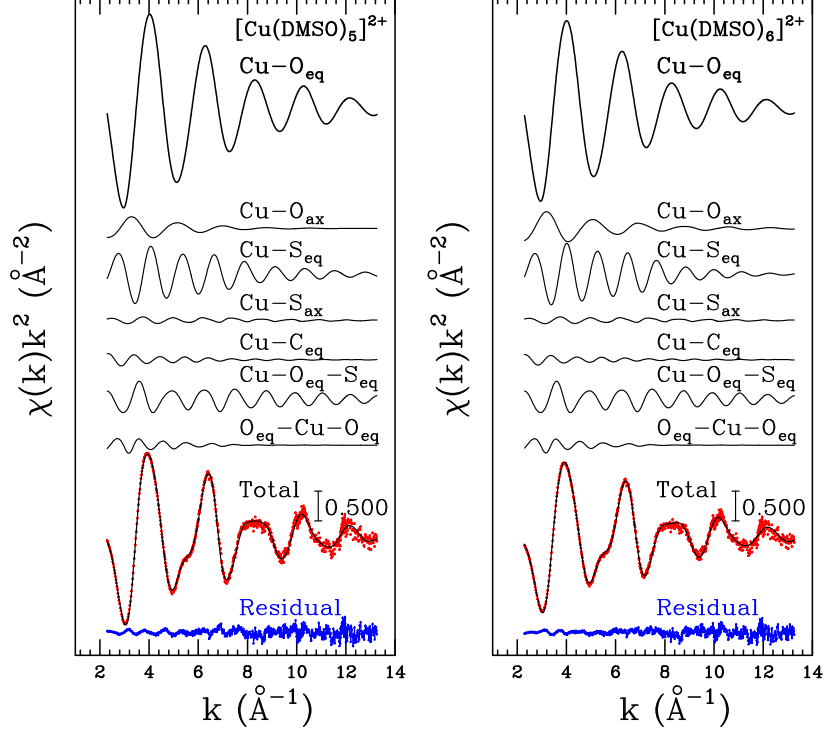

Figure S3. Comparison between the experimental and theoretical Cu K-edge EXAFS spectra of  $\text{Cu}^{2+}$  in DMSO calculated for a fivefold (left panel) and sixfold JT distorted octahedral (right panel) geometry. From the top to the bottom of each panel the following curves are reported:  $\text{Cu-O}_{eq}$ ,  $\text{Cu-O}_{ax}$ , and  $\text{Cu-H}_{eq}$  two-body signals,  $\text{Cu-O}_{eq}\text{-C}_{eq}$  and  $\text{O}_{eq}\text{-Cu-O}_{eq}$  three-body signals, total theoretical contribution (black line) compared to the experimental spectrum (red dotted line) and resulting residual (blue line).

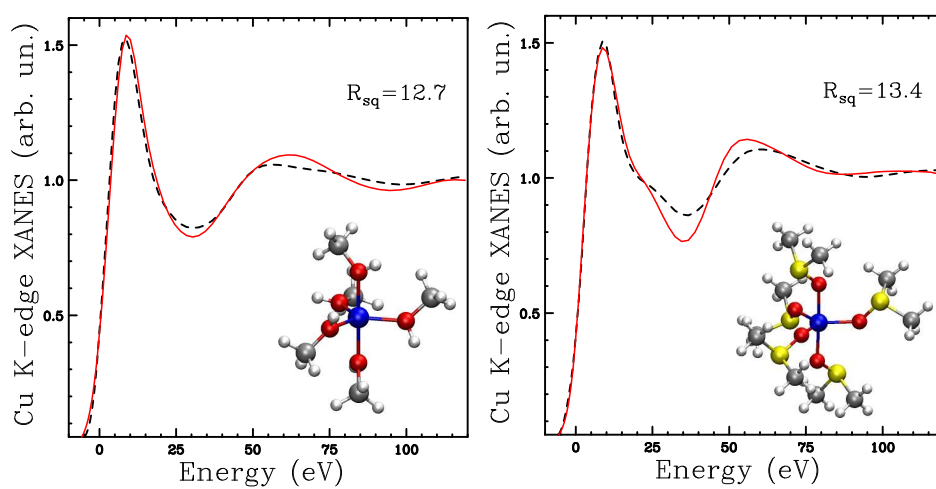

Figure S4. Comparison of the Cu K-edge XANES experimental spectra (black, dashed line) of  $Cu^{2+}$  in MeOH (left panel) and DMSO (right panel) solutions and the theoretical spectra (red, full line) calculated with a trigonal bipyramidal model.
